# Supplementary material for: COVID-19: interim guidance on rehabilitation in the hospital and post-hospital phase from a European Respiratory Society- and American Thoracic Society-coordinated international task force
Source: PubMed Central journal article supplement — Eur Respir J. 2020 Dec 3;56(6):2002197. doi: 10.1183/13993003.02197-2020 (PMC7427118; doi:10.1183/13993003.02197-2020), 2020-12-03
Supplement: ERJ-02197-2020.Table_S2.pdf [file ERJ-02197-2020.Table_S2.pdf]

**Online Table 1. The following experts have filled out the survey and agreed to be mentioned in this overview (alphabetical by country)**

| <b>Name</b>           | <b>Background</b>                      | <b>Country</b> |
|-----------------------|----------------------------------------|----------------|
| Jacqui Kay            | Physiotherapist<br>Physical Medicine & | Australia      |
| Jane Malone           | Rehabilitation                         | Australia      |
| Kimberley Haines      | Physiotherapist                        | Australia      |
| Narelle Cox           | Physiotherapist                        | Australia      |
| Steven Faux           | Physical Medicine &<br>Rehabilitation  | Australia      |
| Sue Berney            | Physiotherapist                        | Australia      |
| Ralf Harun Zwick      | Pulmonologist                          | Austria        |
| Andreas von Leupoldt  | Psychologist                           | Belgium        |
| Chris Burtin          | Physiotherapist                        | Belgium        |
| Daniel Langer         | Physiotherapist                        | Belgium        |
| Grégory Reyckler      | Physiotherapist                        | Belgium        |
| Heleen Demeyer        | Physiotherapist                        | Belgium        |
| Fabio Pitta           | Physiotherapist                        | Brazil         |
| Fernanda Lanza        | Physiotherapist                        | Brazil         |
| Vinicius Maldaner     | Physiotherapist                        | Brazil         |
| Diana Hopkins-Rosseel | Physiotherapist                        | Canada         |
| Didier Saey           | Physiotherapist<br>Physical Medicine & | Canada         |
| Natalja Tchajkova     | Rehabilitation                         | Canada         |
| Roger Goldstein       | Pulmonologist                          | Canada         |
| Rodrigo Torres        | Physiotherapist                        | Chile          |
| Homer Yu              | Pulmonologist                          | China          |

|                          |                         |                |
|--------------------------|-------------------------|----------------|
| Weili Wei                | Pulmonologist           | China          |
| Jhonatan Betancourt-Pena | Physiotherapist         | Colombia       |
| Vicente Benavides        | Physiotherapist         | Colombia       |
| Katerina Neumannova      | Pulmonologist           | Czech Republic |
| Henrik Hansen            | Physiotherapist         | Denmark        |
| Maurice Hayot            | Pulmonologist           | France         |
| Rainer Gloeckl           | Sport scientist         | Germany        |
| Rembert Koczulla         | Pulmonologist           | Germany        |
| Janos Varga              | Pulmonologist           | Hungary        |
| Bruno Balbi              | Pulmonologist           | Italy          |
| Enrico Clini             | Pulmonologist           | Italy          |
| Guido Vaghegini          | Pulmonologist           | Italy          |
| Mara Paneroni            | Physiotherapist         | Italy          |
| Michele Vitacca          | Pulmonologist           | Italy          |
| Stefano Belli            | Physiotherapist         | Italy          |
| Atsuyoshi Kawagoshi      | Physiotherapist         | Japan          |
| Tetsuo Miyagawa          | Physiotherapist         | Japan          |
| Yutaro Oki               | Physiotherapist         | Japan          |
| Alex van 't Hul          | Physiotherapist         | Netherlands    |
| Anne-Loes van der Valk   | Physiotherapist         | Netherlands    |
| Daisy Janssen            | Elderly care specialist | Netherlands    |
| Marika van der Schaaf    | Physiotherapist         | Netherlands    |
| Anita Grongstad          | Physiotherapist         | Norway         |
| Anne Edvardsen           | Physiotherapist         | Norway         |
| Bente Frisk              | Physiotherapist         | Norway         |
| Alda Marques             | Physiotherapist         | Portugal       |
| Paulo Abreu              | Physiotherapist         | Portugal       |

|                      |                                           |             |
|----------------------|-------------------------------------------|-------------|
| Antonio Rios         | Physiotherapist                           | Spain       |
| Elena Gimenos-Santos | Physiotherapist/psychologists             | Spain       |
| Andre Nyberg         | Physiotherapist                           | Sweden      |
| Karin Wadell         | Physiotherapist                           | Sweden      |
| Malin Nygren-Bonnier | Physiotherapist                           | Sweden      |
| Isabelle Fresard     | Pulmonologist                             | Switzerland |
| Deniz Inal-Ince      | Physiotherapist                           | Turkey      |
| Melda Saglam         | Physiotherapist                           | Turkey      |
| Anne-Marie Doyle     | Psychologists                             | UK          |
| Arietta Spinou       | Physiotherapist                           | UK          |
| Claire Nolan         | Physiotherapist                           | UK          |
| Enya Daynes          | Physiotherapist                           | UK          |
| Ioannis Vogiatzis    | Exercise physiologist                     | UK          |
| Joy Conway           | Physiotherapist                           | UK          |
| Linzy Houchen        | Physiotherapist                           | UK          |
| Matthew Maddocks     | Physiotherapist                           | UK          |
| Rachael Evans        | Pulmonologist                             | UK          |
| Will Man             | Pulmonologist                             | UK          |
| Abebaw Yohannes      | Physiotherapist                           | US          |
| Angela Campbell      | Physiotherapist                           | US          |
| Carolyn Rochester    | Pulmonologist/critical care<br>specialist | US          |
| Chris Garvey         | Nurse                                     | US          |
| Chris Wells          | Physiotherapist                           | US          |
| Dale Needham         | Pulmonologist/critical care<br>specialist | US          |

|                  |                                           |    |
|------------------|-------------------------------------------|----|
| Linda Nici       | Pulmonologist/critical care<br>specialist | US |
| Melissa Bednarek | Physiotherapist                           | US |
| Rebecca Crouch   | Physiotherapist                           | US |
| Surya Bhatt      | Pulmonologist/critical care<br>specialist | US |
